# Supplementary material
Source: PubMed Central journal article supplement (PMC10256139)
Supplement: NIHMS1902865-supplement-Sup1.pdf [file NIHMS1902865-supplement-Sup1.pdf]

| Individual                            | 1                                                                       | 2                                                                                                                                              | 3                                                                                                                                                                     | 4                                                                                                                                             | 5                           | 6                                         | 7                                                                                                       | 8                                                      | 9                                   | 10                                | 11                                                                                                                         | 12                                                                                                                                        | 13                     | 14<br>(brother of 15)                                                                                                                                                                                                                                 | 15<br>(brother of 14)                       | 16                 | 17                                                                                     | 18                                                         |
|---------------------------------------|-------------------------------------------------------------------------|------------------------------------------------------------------------------------------------------------------------------------------------|-----------------------------------------------------------------------------------------------------------------------------------------------------------------------|-----------------------------------------------------------------------------------------------------------------------------------------------|-----------------------------|-------------------------------------------|---------------------------------------------------------------------------------------------------------|--------------------------------------------------------|-------------------------------------|-----------------------------------|----------------------------------------------------------------------------------------------------------------------------|-------------------------------------------------------------------------------------------------------------------------------------------|------------------------|-------------------------------------------------------------------------------------------------------------------------------------------------------------------------------------------------------------------------------------------------------|---------------------------------------------|--------------------|----------------------------------------------------------------------------------------|------------------------------------------------------------|
| <b>Age at last visit (years), sex</b> | 3.8, f                                                                  | 1, m                                                                                                                                           | 9.3, m                                                                                                                                                                | 4, m                                                                                                                                          | 16, f                       | 12.5, m                                   | 13, m                                                                                                   | 2, f                                                   | 8, m                                | 3.8, m                            | 1.6, m                                                                                                                     | 13.5, m                                                                                                                                   | 3, m                   | 7, m                                                                                                                                                                                                                                                  | 9, m                                        | 7, m               | 10, m                                                                                  | 5, f                                                       |
| <b>Genetic variant</b>                | c.2051_2052dup<br>p.(Glu685*)                                           | c.2107G>T<br>p.(Glu703*)                                                                                                                       | c.3034C>T<br>p.(Gln1012*)                                                                                                                                             | c.4279C>T<br>p.(Gln1427*)                                                                                                                     | c.65del<br>p.(Gly22Valfs*7) | c.1099_1103dupCAGTT<br>p.(Glu369Serfs*25) | c.1646_1650del<br>p.(Ile549Argfs*6)                                                                     | c.2164_2167del<br>p.(Lys722Valfs*17)                   | c.2714dup<br>p.(Met906Tyrfs*15)     | c.4829dup<br>p.(Leu1610Phefs*259) | c.5054dup<br>p.(Pro1686Serfs*183)                                                                                          | c.183_186+2del<br>p.?                                                                                                                     | c.264A>G<br>p.(Glu88=) | c.768+1G>A<br>p.?                                                                                                                                                                                                                                     | c.768+1G>A<br>p.?                           | c.2848-2A>C<br>p.? | arr[hg19]<br>7q22.3(104,696,686-<br>105,407,628)x1                                     | arr[hg19]<br>7q22.3(104,730,300-<br>104,791,108)x1         |
| <b>Inheritance</b>                    | dn                                                                      | dn                                                                                                                                             | dn                                                                                                                                                                    | dn                                                                                                                                            | n/a*                        | paternal                                  | dn                                                                                                      | dn                                                     | dn                                  | dn                                | dn                                                                                                                         | dn                                                                                                                                        | dn                     | paternal                                                                                                                                                                                                                                              | paternal                                    | n/a*               | dn                                                                                     | dn                                                         |
| <b>Dysmorphic features</b>            |                                                                         |                                                                                                                                                |                                                                                                                                                                       |                                                                                                                                               |                             |                                           |                                                                                                         |                                                        |                                     |                                   |                                                                                                                            |                                                                                                                                           |                        |                                                                                                                                                                                                                                                       |                                             |                    |                                                                                        |                                                            |
| Macrocephaly (Z>2.0)                  | +                                                                       | +                                                                                                                                              | +                                                                                                                                                                     | +                                                                                                                                             | +                           | -                                         | +                                                                                                       | -                                                      | -                                   | +                                 | +                                                                                                                          | -                                                                                                                                         | -                      | -                                                                                                                                                                                                                                                     | -                                           | -                  | -                                                                                      | +                                                          |
| → OFC Z-Score at last visit           | +3.0                                                                    | n/a                                                                                                                                            | +2.7                                                                                                                                                                  | +3.3                                                                                                                                          | n/a                         | +1.0                                      | +2.5                                                                                                    | +1.2                                                   | n/a                                 | +3.5                              | n/a                                                                                                                        | n/a                                                                                                                                       | n/a                    | +0.9                                                                                                                                                                                                                                                  | -0.3                                        | n/a                | +1.8                                                                                   | n/a                                                        |
| Dolichocephaly                        | -                                                                       | -                                                                                                                                              | -                                                                                                                                                                     | -                                                                                                                                             | -                           | -                                         | -                                                                                                       | +                                                      | n/a                                 | -                                 | +                                                                                                                          | -                                                                                                                                         | -                      | -                                                                                                                                                                                                                                                     | -                                           | -                  | -                                                                                      | -                                                          |
| Large forehead                        | +                                                                       | -                                                                                                                                              | +                                                                                                                                                                     | +                                                                                                                                             | +                           | -                                         | +                                                                                                       | +                                                      | n/a                                 | +                                 | -                                                                                                                          | -                                                                                                                                         | -                      | -                                                                                                                                                                                                                                                     | -                                           | -                  | +                                                                                      | +                                                          |
| Epicanthal folds                      | +                                                                       | +                                                                                                                                              | +                                                                                                                                                                     | +                                                                                                                                             | -                           | -                                         | -                                                                                                       | -                                                      | n/a                                 | -                                 | +                                                                                                                          | -                                                                                                                                         | -                      | -                                                                                                                                                                                                                                                     | +                                           | -                  | -                                                                                      | +                                                          |
| Deep-set eyes                         | +                                                                       | -                                                                                                                                              | +                                                                                                                                                                     | -                                                                                                                                             | +                           | -                                         | +                                                                                                       | -                                                      | n/a                                 | +                                 | -                                                                                                                          | -                                                                                                                                         | -                      | -                                                                                                                                                                                                                                                     | -                                           | +                  | -                                                                                      | -                                                          |
| Prominent nasolabial folds            | -                                                                       | -                                                                                                                                              | -                                                                                                                                                                     | -                                                                                                                                             | +                           | -                                         | -                                                                                                       | +                                                      | n/a                                 | -                                 | +                                                                                                                          | -                                                                                                                                         | -                      | -                                                                                                                                                                                                                                                     | -                                           | -                  | -                                                                                      | -                                                          |
| Full cheeks                           | +                                                                       | -                                                                                                                                              | +                                                                                                                                                                     | -                                                                                                                                             | +                           | -                                         | -                                                                                                       | +                                                      | n/a                                 | +                                 | +                                                                                                                          | -                                                                                                                                         | -                      | -                                                                                                                                                                                                                                                     | -                                           | +                  | +                                                                                      | +                                                          |
| Small ears                            | +                                                                       | -                                                                                                                                              | -                                                                                                                                                                     | -                                                                                                                                             | +                           | -                                         | +                                                                                                       | -                                                      | n/a                                 | -                                 | -                                                                                                                          | -                                                                                                                                         | -                      | -                                                                                                                                                                                                                                                     | -                                           | +                  | -                                                                                      | -                                                          |
| Finger/toe clinodactyly               | +                                                                       | -                                                                                                                                              | +                                                                                                                                                                     | -                                                                                                                                             | +                           | -                                         | -                                                                                                       | n/a                                                    | -                                   | -                                 | -                                                                                                                          | -                                                                                                                                         | -                      | +                                                                                                                                                                                                                                                     | -                                           | -                  | -                                                                                      | -                                                          |
| <b>Neurodevelopmental features</b>    |                                                                         |                                                                                                                                                |                                                                                                                                                                       |                                                                                                                                               |                             |                                           |                                                                                                         |                                                        |                                     |                                   |                                                                                                                            |                                                                                                                                           |                        |                                                                                                                                                                                                                                                       |                                             |                    |                                                                                        |                                                            |
| Developmental motor delay             | +                                                                       | +                                                                                                                                              | -                                                                                                                                                                     | +                                                                                                                                             | +                           | +                                         | +                                                                                                       | +                                                      | +                                   | +                                 | +                                                                                                                          | -                                                                                                                                         | -                      | -                                                                                                                                                                                                                                                     | -                                           | +                  | +                                                                                      | +                                                          |
| → Walking unsupported at              | 24 months                                                               | n/a                                                                                                                                            | n/a                                                                                                                                                                   | 23 months                                                                                                                                     | n/a                         | 23 months                                 | n/a                                                                                                     | n/a                                                    | 23 months                           | 19 months                         | no walking so far                                                                                                          | 14 months                                                                                                                                 | 11 months              | 15-16 months                                                                                                                                                                                                                                          | >12 months                                  | 23 months          | n/a                                                                                    | 18 months                                                  |
| Developmental speech delay            | +                                                                       | +                                                                                                                                              | +                                                                                                                                                                     | +                                                                                                                                             | +                           | +                                         | +                                                                                                       | +                                                      | +                                   | +                                 | +                                                                                                                          | +                                                                                                                                         | +                      | -                                                                                                                                                                                                                                                     | +                                           | +                  | +                                                                                      | +                                                          |
| → First words with                    | 10 months                                                               | n/a                                                                                                                                            | n/a                                                                                                                                                                   | 15 months                                                                                                                                     | n/a                         | 30 months                                 | n/a                                                                                                     | n/a                                                    | normal                              | 24 months                         | n/a                                                                                                                        | 18 months                                                                                                                                 | no speech              | n/a                                                                                                                                                                                                                                                   | n/a                                         | no speech          | n/a                                                                                    | 45 months                                                  |
| Developmental regression              | +                                                                       | -                                                                                                                                              | -                                                                                                                                                                     | +                                                                                                                                             | -                           | -                                         | -                                                                                                       | -                                                      | -                                   | -                                 | -                                                                                                                          | -                                                                                                                                         | -                      | -                                                                                                                                                                                                                                                     | -                                           | -                  | -                                                                                      | -                                                          |
| Intellectual disability               | n/a                                                                     | +                                                                                                                                              | -                                                                                                                                                                     | +                                                                                                                                             | n/a                         | +                                         | +                                                                                                       | n/a                                                    | -                                   | -                                 | n/a                                                                                                                        | +                                                                                                                                         | -                      | -                                                                                                                                                                                                                                                     | -                                           | n/a                | +                                                                                      | n/a                                                        |
| → IQ                                  | n/a                                                                     | n/a                                                                                                                                            | n/a                                                                                                                                                                   | n/a                                                                                                                                           | n/a                         | n/a                                       | 69 (VIQ: 71, PIQ: 65)                                                                                   | n/a                                                    | n/a                                 | 83                                | n/a                                                                                                                        | n/a                                                                                                                                       | n/a                    | high average IQ                                                                                                                                                                                                                                       | n/a                                         | n/a                | VIQ: 71, PIQ: 63                                                                       | n/a                                                        |
| Autism spectrum disorder              | -                                                                       | -                                                                                                                                              | -                                                                                                                                                                     | +                                                                                                                                             | +                           | -                                         | -                                                                                                       | n/a                                                    | -                                   | +                                 | -                                                                                                                          | -                                                                                                                                         | +                      | +                                                                                                                                                                                                                                                     | +                                           | +                  | -                                                                                      | -                                                          |
| Pathological EEG                      | +                                                                       | -                                                                                                                                              | -                                                                                                                                                                     | -                                                                                                                                             | n/a                         | -                                         | n/a                                                                                                     | n/a                                                    | -                                   | -                                 | -                                                                                                                          | -                                                                                                                                         | n/a                    | -                                                                                                                                                                                                                                                     | -                                           | -                  | -                                                                                      | -                                                          |
| → Epilepsy                            | -                                                                       | -                                                                                                                                              | -                                                                                                                                                                     | -                                                                                                                                             | -                           | -                                         | -                                                                                                       | -                                                      | -                                   | -                                 | -                                                                                                                          | -                                                                                                                                         | -                      | -                                                                                                                                                                                                                                                     | -                                           | -                  | -                                                                                      | -                                                          |
| → Febrile seizures                    | -                                                                       | -                                                                                                                                              | -                                                                                                                                                                     | -                                                                                                                                             | -                           | -                                         | -                                                                                                       | -                                                      | -                                   | +                                 | -                                                                                                                          | -                                                                                                                                         | -                      | -                                                                                                                                                                                                                                                     | -                                           | -                  | -                                                                                      | +                                                          |
| Muscular hypotonia                    | +                                                                       | -                                                                                                                                              | -                                                                                                                                                                     | +                                                                                                                                             | +                           | -                                         | -                                                                                                       | +                                                      | -                                   | +                                 | +                                                                                                                          | -                                                                                                                                         | -                      | -                                                                                                                                                                                                                                                     | -                                           | +                  | -                                                                                      | +                                                          |
| <b>Behavioral</b>                     |                                                                         |                                                                                                                                                |                                                                                                                                                                       |                                                                                                                                               |                             |                                           |                                                                                                         |                                                        |                                     |                                   |                                                                                                                            |                                                                                                                                           |                        |                                                                                                                                                                                                                                                       |                                             |                    |                                                                                        |                                                            |
| ADHD                                  | -                                                                       | -                                                                                                                                              | -                                                                                                                                                                     | -                                                                                                                                             | -                           | -                                         | -                                                                                                       | -                                                      | -                                   | -                                 | -                                                                                                                          | -                                                                                                                                         | -                      | -                                                                                                                                                                                                                                                     | -                                           | +                  | -                                                                                      | -                                                          |
| Stereotypical behavior                | -                                                                       | -                                                                                                                                              | -                                                                                                                                                                     | +                                                                                                                                             | +                           | -                                         | -                                                                                                       | +                                                      | -                                   | +                                 | -                                                                                                                          | -                                                                                                                                         | -                      | +                                                                                                                                                                                                                                                     | -                                           | +                  | -                                                                                      | -                                                          |
| Self-injurious behavior               | -                                                                       | -                                                                                                                                              | -                                                                                                                                                                     | -                                                                                                                                             | -                           | -                                         | -                                                                                                       | -                                                      | -                                   | -                                 | +                                                                                                                          | -                                                                                                                                         | -                      | -                                                                                                                                                                                                                                                     | -                                           | +                  | -                                                                                      | -                                                          |
| Aggressive behavior                   | -                                                                       | -                                                                                                                                              | -                                                                                                                                                                     | -                                                                                                                                             | -                           | -                                         | -                                                                                                       | -                                                      | -                                   | -                                 | +                                                                                                                          | -                                                                                                                                         | -                      | -                                                                                                                                                                                                                                                     | -                                           | -                  | -                                                                                      | -                                                          |
| Sleep disturbances                    | +                                                                       | -                                                                                                                                              | +                                                                                                                                                                     | +                                                                                                                                             | +                           | -                                         | n/a                                                                                                     | -                                                      | -                                   | +                                 | -                                                                                                                          | -                                                                                                                                         | +                      | +, normal at 3y                                                                                                                                                                                                                                       | -                                           | +                  | +                                                                                      | -                                                          |
| <b>Organ malformations</b>            |                                                                         |                                                                                                                                                |                                                                                                                                                                       |                                                                                                                                               |                             |                                           |                                                                                                         |                                                        |                                     |                                   |                                                                                                                            |                                                                                                                                           |                        |                                                                                                                                                                                                                                                       |                                             |                    |                                                                                        |                                                            |
| Corpus callosum hypoplasia            | -                                                                       | +                                                                                                                                              | -                                                                                                                                                                     | +                                                                                                                                             | n/a                         | -                                         | -                                                                                                       | n/a                                                    | +                                   | -                                 | -                                                                                                                          | n/a                                                                                                                                       | n/a                    | -                                                                                                                                                                                                                                                     | -                                           | -                  | -                                                                                      | -                                                          |
| Ventriculomegaly                      | +                                                                       | -                                                                                                                                              | -                                                                                                                                                                     | -                                                                                                                                             | n/a                         | -                                         | -                                                                                                       | n/a                                                    | +                                   | -                                 | -                                                                                                                          | n/a                                                                                                                                       | n/a                    | -                                                                                                                                                                                                                                                     | -                                           | -                  | -                                                                                      | -                                                          |
| Reduced brain volume                  | +                                                                       | -                                                                                                                                              | -                                                                                                                                                                     | -                                                                                                                                             | n/a                         | -                                         | -                                                                                                       | n/a                                                    | -                                   | -                                 | -                                                                                                                          | n/a                                                                                                                                       | n/a                    | -                                                                                                                                                                                                                                                     | -                                           | -                  | -                                                                                      | -                                                          |
| Cerebral cysts                        | -                                                                       | +                                                                                                                                              | +                                                                                                                                                                     | -                                                                                                                                             | n/a                         | -                                         | -                                                                                                       | n/a                                                    | -                                   | -                                 | -                                                                                                                          | n/a                                                                                                                                       | n/a                    | -                                                                                                                                                                                                                                                     | -                                           | -                  | -                                                                                      | -                                                          |
| Delayed myelination                   | +                                                                       | +                                                                                                                                              | -                                                                                                                                                                     | +                                                                                                                                             | n/a                         | +                                         | -                                                                                                       | n/a                                                    | -                                   | -                                 | -                                                                                                                          | n/a                                                                                                                                       | n/a                    | -                                                                                                                                                                                                                                                     | -                                           | -                  | -                                                                                      | -                                                          |
| <b>Gastrointestinal features</b>      |                                                                         |                                                                                                                                                |                                                                                                                                                                       |                                                                                                                                               |                             |                                           |                                                                                                         |                                                        |                                     |                                   |                                                                                                                            |                                                                                                                                           |                        |                                                                                                                                                                                                                                                       |                                             |                    |                                                                                        |                                                            |
| Constipation                          | +                                                                       | +                                                                                                                                              | +                                                                                                                                                                     | +                                                                                                                                             | -                           | +                                         | -                                                                                                       | +                                                      | +                                   | -                                 | -                                                                                                                          | +                                                                                                                                         | -                      | -                                                                                                                                                                                                                                                     | -                                           | -                  | -                                                                                      | -                                                          |
| Gastroesophageal reflux               | -                                                                       | +                                                                                                                                              | -                                                                                                                                                                     | -                                                                                                                                             | -                           | -                                         | -                                                                                                       | -                                                      | -                                   | -                                 | -                                                                                                                          | -                                                                                                                                         | -                      | -                                                                                                                                                                                                                                                     | -                                           | -                  | -                                                                                      | -                                                          |
| Vomiting                              | +                                                                       | +                                                                                                                                              | -                                                                                                                                                                     | -                                                                                                                                             | -                           | -                                         | -                                                                                                       | -                                                      | -                                   | -                                 | +                                                                                                                          | -                                                                                                                                         | -                      | -                                                                                                                                                                                                                                                     | -                                           | -                  | -                                                                                      | -                                                          |
| <b>Other</b>                          | Hyperalaninemia,<br>borderline<br>elevated serum<br>lactate, strabismus | 26wk<br>premature,<br>large VSD,<br>ROP,<br>recurrent<br>ALTE/BRUE,<br>multiple<br>ependymal<br>nodules and<br>small pituitary<br>on brain MRI | Aphasia,<br>dysphasia,<br>additional<br>MYH8 variant<br>segregating<br>with trismus-<br>pseudocampto-<br>dactyly in the<br>family, central<br>apnea,<br>brachycephaly | Mild left eye<br>strabismus,<br>hypertelorism,<br>polycythemia at<br>birth. Additional<br>de novo variant:<br>CHD8 c.3340G>T,<br>p.(Glu1114*) | Diarrhea                    | Almost daily<br>headaches                 | Mega cisterna<br>magna, sensory<br>integration<br>disorder, verbal<br>dyspraxia, high pain<br>threshold | Congenitally<br>adducted thumbs<br>requiring splinting | Headaches,<br>insensitivity to pain | Supernumerary nipple              | Failure to thrive,<br>recurrent respiratory<br>infections, double<br>hair whorl,<br>ears posteriorly<br>rotated, full lips | Brachymetacarpia,<br>Brachymetatarsia.<br>Anxiety disorder,<br>selective mutism.<br>High-arched<br>palate, cutis<br>marmorata.<br>Obesity | None                   | Preauricular sinus on left<br>ear, sinus at crus helix on<br>right ear, pervasive<br>developmental disorder,<br>bleeding tendency, mild<br>to moderate<br>sensorineural hearing<br>impairment (homozygous<br>variant: GJB2 c.109G>A,<br>p.(Val37Ile)) | Atypical<br>autism,<br>bleeding<br>tendency | None               | Everted lower lip,<br>low-hanging<br>columella, pervasive<br>developmental<br>disorder | Bilateral<br>periventricular<br>heterotopia,<br>pachygyria |

\* The mother does not carry the variant, father unavailable for testing

n/a: not available, VIQ: Verbal IQ, PIQ: Performance IQ, VSD: ventricular septal defect, ROP: retinopathy of prematurity, ALTE/BRUE: apparent life-threatening event/brief resolved unexplained event
